# Supplementary material for: One-Step Calcination to Gain Exfoliated g-C3N4/MoO2 Composites for High-Performance Photocatalytic Hydrogen Evolution
Source: MDPI journal article supplement (doi:10.3390/molecules27217178), 2022-10-24
Supplement: s1 [file s1]

# Supporting Information

## One-Step Calcination to Gain Exfoliated g-C<sub>3</sub>N<sub>4</sub>/MoO<sub>2</sub> Composites for High-Performance Photocatalytic Hydrogen Evolution

Yan Chen <sup>1,2</sup>, Ao Li <sup>1,2</sup>, Xiuli Fu <sup>2</sup> and Zhijian Peng <sup>1,\*</sup>

<sup>1</sup> School of Science, China University of Geosciences, Beijing 100083, China

<sup>2</sup> School of Science, Beijing University of Posts and Telecommunications, Beijing 100876, China

\* Correspondence: pengzhijian@cugb.edu.cn; Tel.: +86-10-82320255

This work was supported by the National Natural Science Foundation of China (grant nos. 11674035 and 61274015), and the Fundamental Research Funds for the Central Universities.

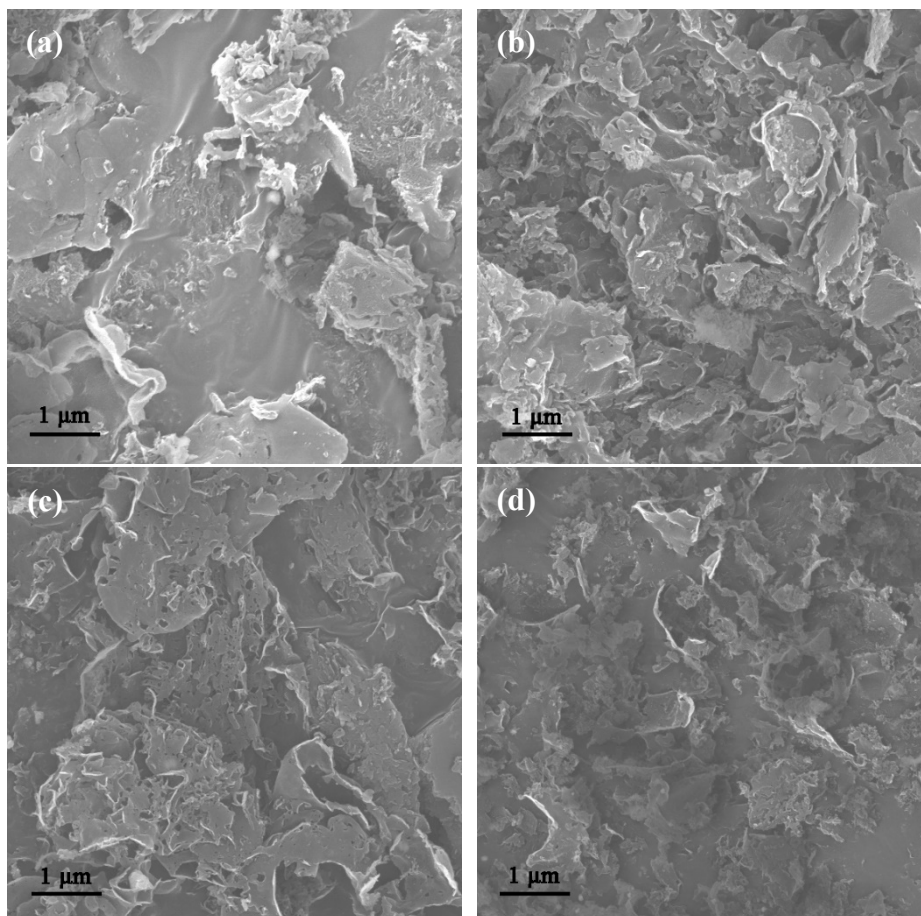

**Figure S1** Typical low-magnification SEM images of (a) CNM-1, (b) CNM-2, (c) CNM-4, (d) CNM-8.

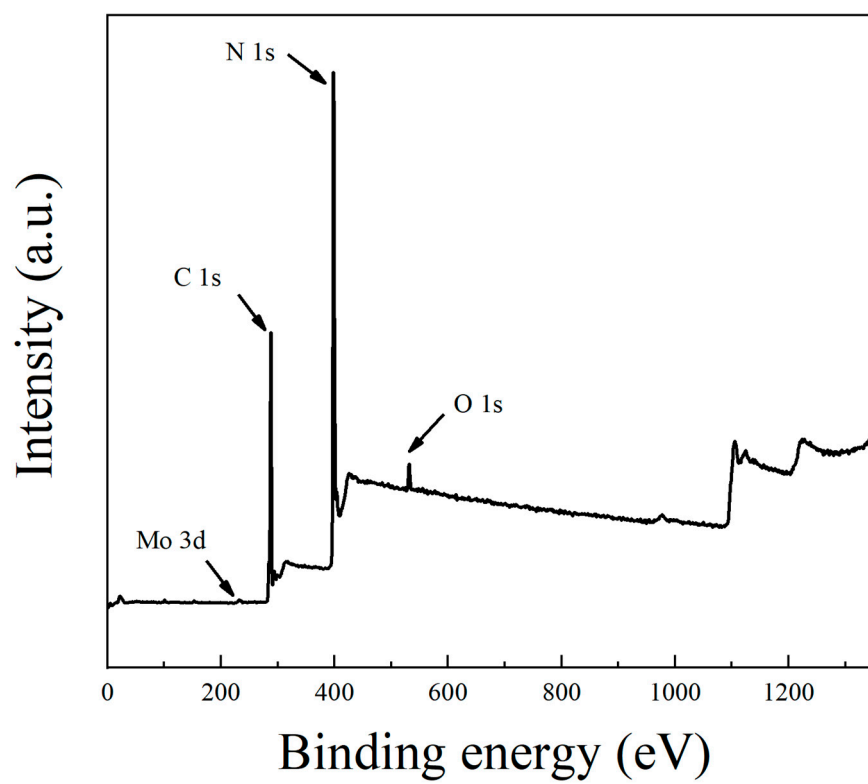

**Figure S2** XPS survey spectrum of the optimal sample CNM-4.

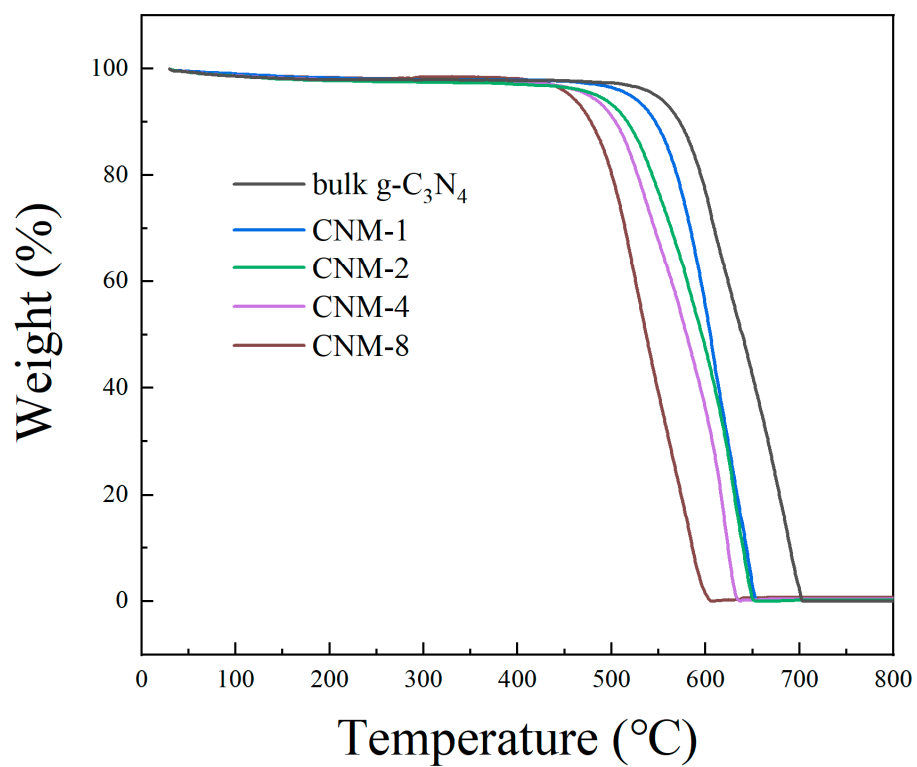

**Figure S3** TG curves of bulk g-C<sub>3</sub>N<sub>4</sub> and the precursors to prepare the different exfoliated g-C<sub>3</sub>N<sub>4</sub>/MoO<sub>2</sub> composites.

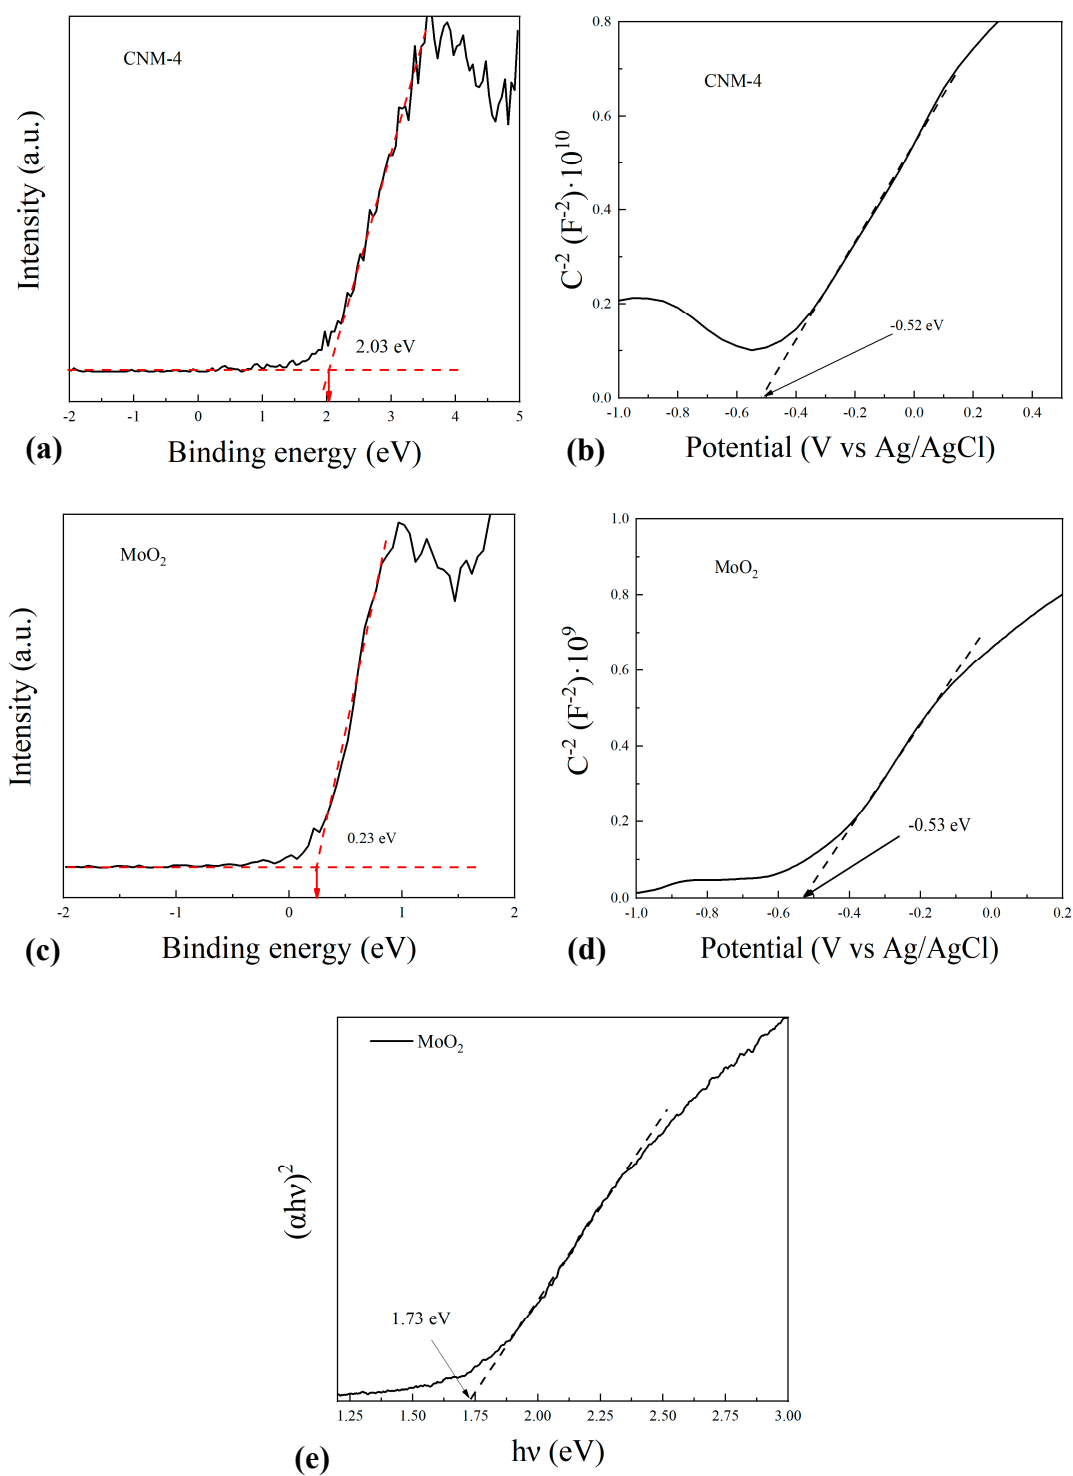

**Figure S4.** Valence-band XPS spectrum (a) and Mott-Schottky plot (b) of the optimal sample CNM-4. Valence-band XPS spectrum (c) and Mott-Schottky plot (d) of MoO<sub>2</sub>. (e)  $(\alpha h\nu)^2$  versus  $E_g$  plot of MoO<sub>2</sub>.
